# Supplementary material
Source: PubMed Central journal article supplement (PMC6003872)
Supplement: NIHMS961989-supplement-11.pdf [file NIHMS961989-supplement-11.pdf]

**Supplemental Table 3**

| Assay         | BALB/cJ |        | C57BL/6J |        | NOD/ShiLtJ |        | PWK/PhJ |        | SPRET/EiJ |        | all combined |         |
|---------------|---------|--------|----------|--------|------------|--------|---------|--------|-----------|--------|--------------|---------|
|               | notx    | KLA    | notx     | KLA    | notx       | KLA    | notx    | KLA    | notx      | KLA    | notx         | KLA     |
| ATAC-seq      | 18,265  | 17,667 | 33,335   | 33,269 | 29,763     | 28,561 | 50,609  | 50,988 | 74,577    | 74,136 | 88,711       | 89,651  |
| PU.1          | 64,801  | 77,387 | 81,308   | 65,435 | 69,385     | 53,078 | 59,522  | 55,603 | 74,941    | 44,886 | 117,728      | 101,314 |
| C/EBP $\beta$ | 46,074  | 52,816 | 33,545   | 39,471 | 53,444     | 31,884 | 36,926  | 41,871 | 16,180    | 22,684 | 78,869       | 80,755  |
| CJUN          | 51,558  | 34,215 | 23,083   | 43,290 | 50,216     | 73,955 | 35,895  | 43,748 | 29,676    | 40,113 | 79,478       | 94,058  |
| P65           | 39,001  | 27,180 | 43,093   | 55,406 | 49,172     | 68,088 | 41,703  | 34,329 | 10,051    | 53,698 | 80,585       | 100,642 |
| H3K27ac       | 28,364  | 42,585 | 37,779   | 40,206 | 22,723     | 24,441 | 39,526  | 56,549 | 34,776    | 28,951 | 81,437       | 92,560  |
| H3K4me2       | 50,323  | 49,310 | 38,912   | 35,291 | 44,105     | 39,378 | 46,742  | 59,643 | 44,101    | 41,619 | 95,909       | 95,472  |

Table S3 (related to Figure 3). Summary of sequencing assays. Number of features (peaks or regions) identified for each of assay (ATAC-seq, PU.1 ChIP-seq, CEBP $\beta$  ChIP-seq, CJUN ChIP-seq, P65 ChIP-seq, H3K27ac ChIP-seq and H3K4me2 ChIP-seq) in the five strains of BMDMs under notx and KLA-treated conditions for 1 hour after IDR, as well as the union of features per experiment.

**Supplemental Table 6**

|                   | all CRDs | strain-specific | strain-similar | unclear |
|-------------------|----------|-----------------|----------------|---------|
| ATAC-seq notx     | 3439     | 3360            | 8              | 71      |
| ATAC-seq KLA      | 3891     | 3889            | 0              | 2       |
| PU.1 notx         | 438      | 393             | 15             | 30      |
| PU.1 KLA          | 548      | 425             | 33             | 90      |
| CEBP $\beta$ notx | 793      | 791             | 0              | 2       |
| CEBP $\beta$ KLA  | 388      | 377             | 1              | 10      |
| CJUN notx         | 336      | 326             | 0              | 10      |
| CJUN KLA          | 538      | 530             | 3              | 5       |
| P65 KLA           | 719      | 694             | 3              | 22      |

Table S6 (related to Figure 5). Summary of CRDs. List of all CRDs for all assays and treatments, as well as number of CRDs that are strain-specific and strain-similar.
