# Supplementary material
Source: PubMed Central journal article supplement (PMC6003872)

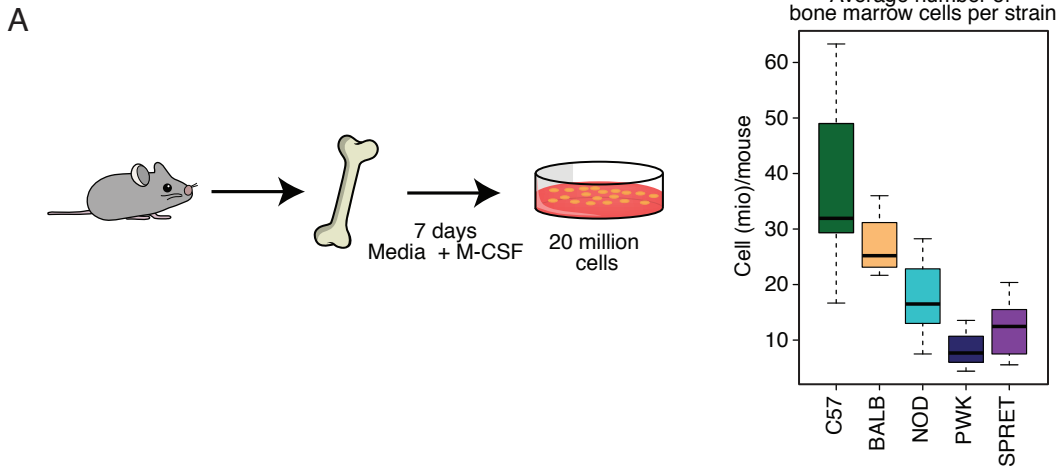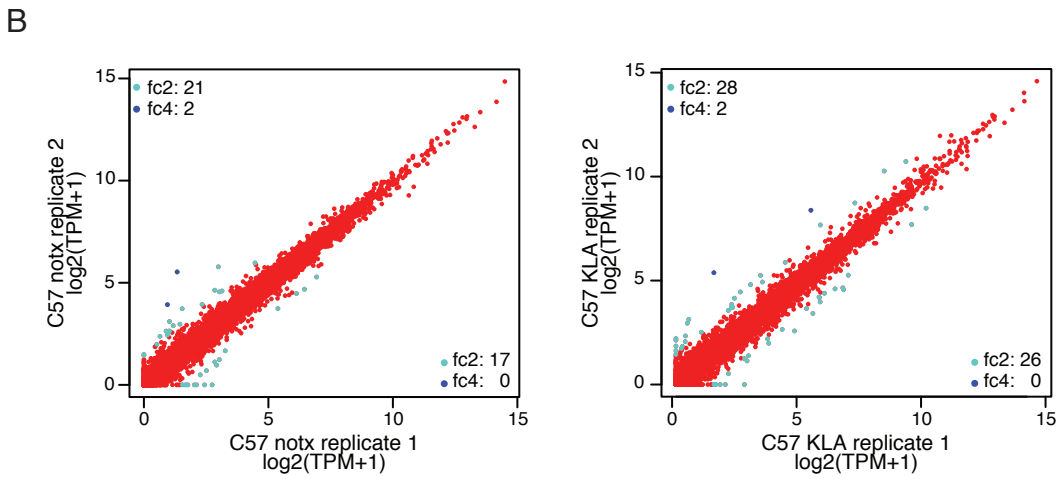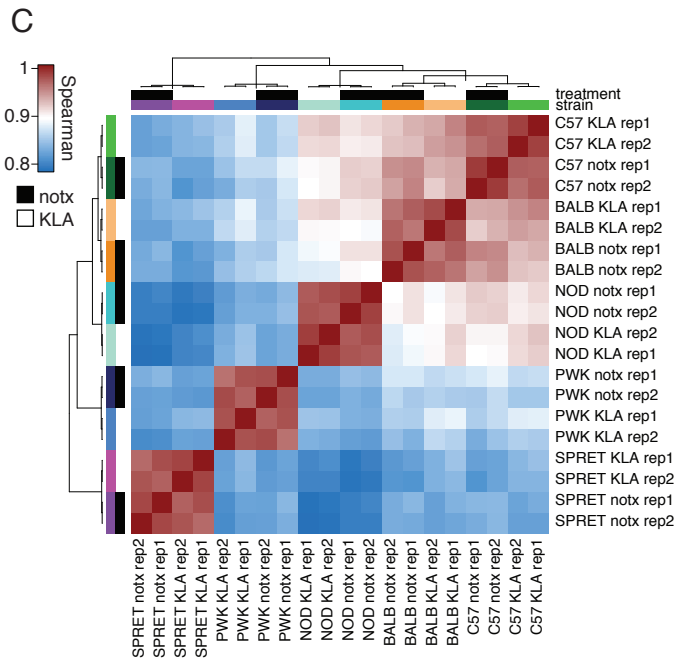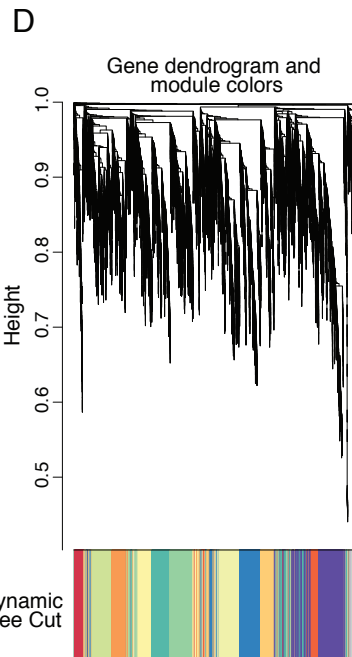

Figure S1

Supplement: NIHMS961989-supplement-1.pdf [file NIHMS961989-supplement-1.pdf]

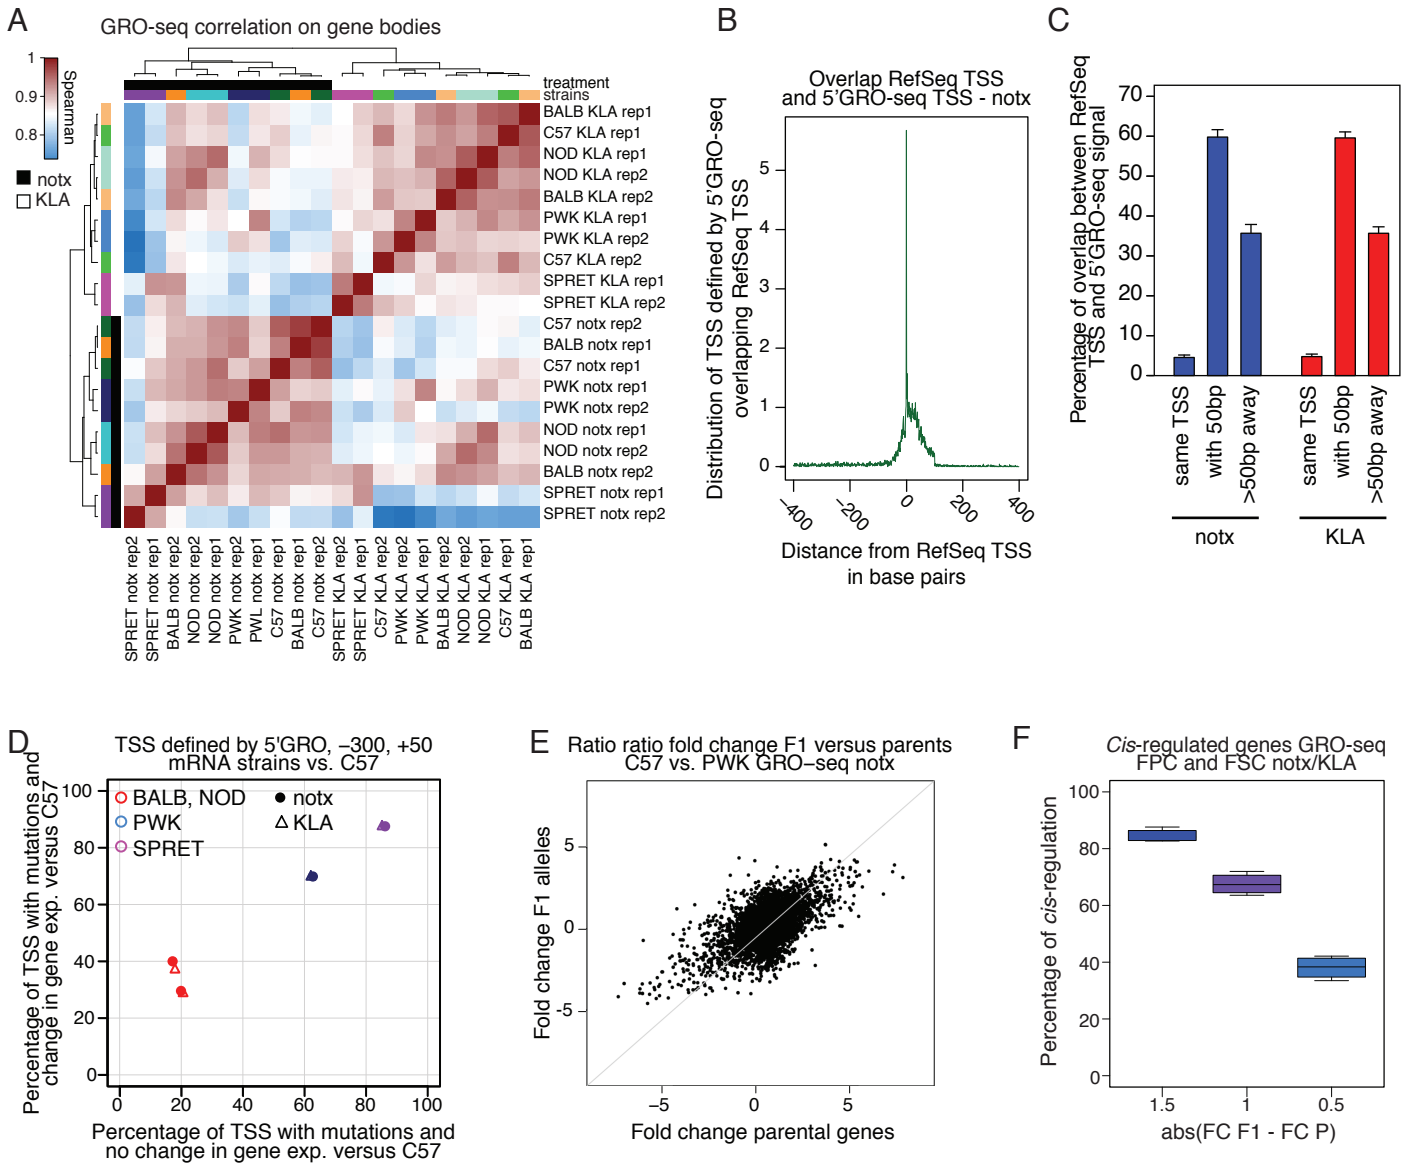

Figure S2

Supplement: NIHMS961989-supplement-2.pdf [file NIHMS961989-supplement-2.pdf]

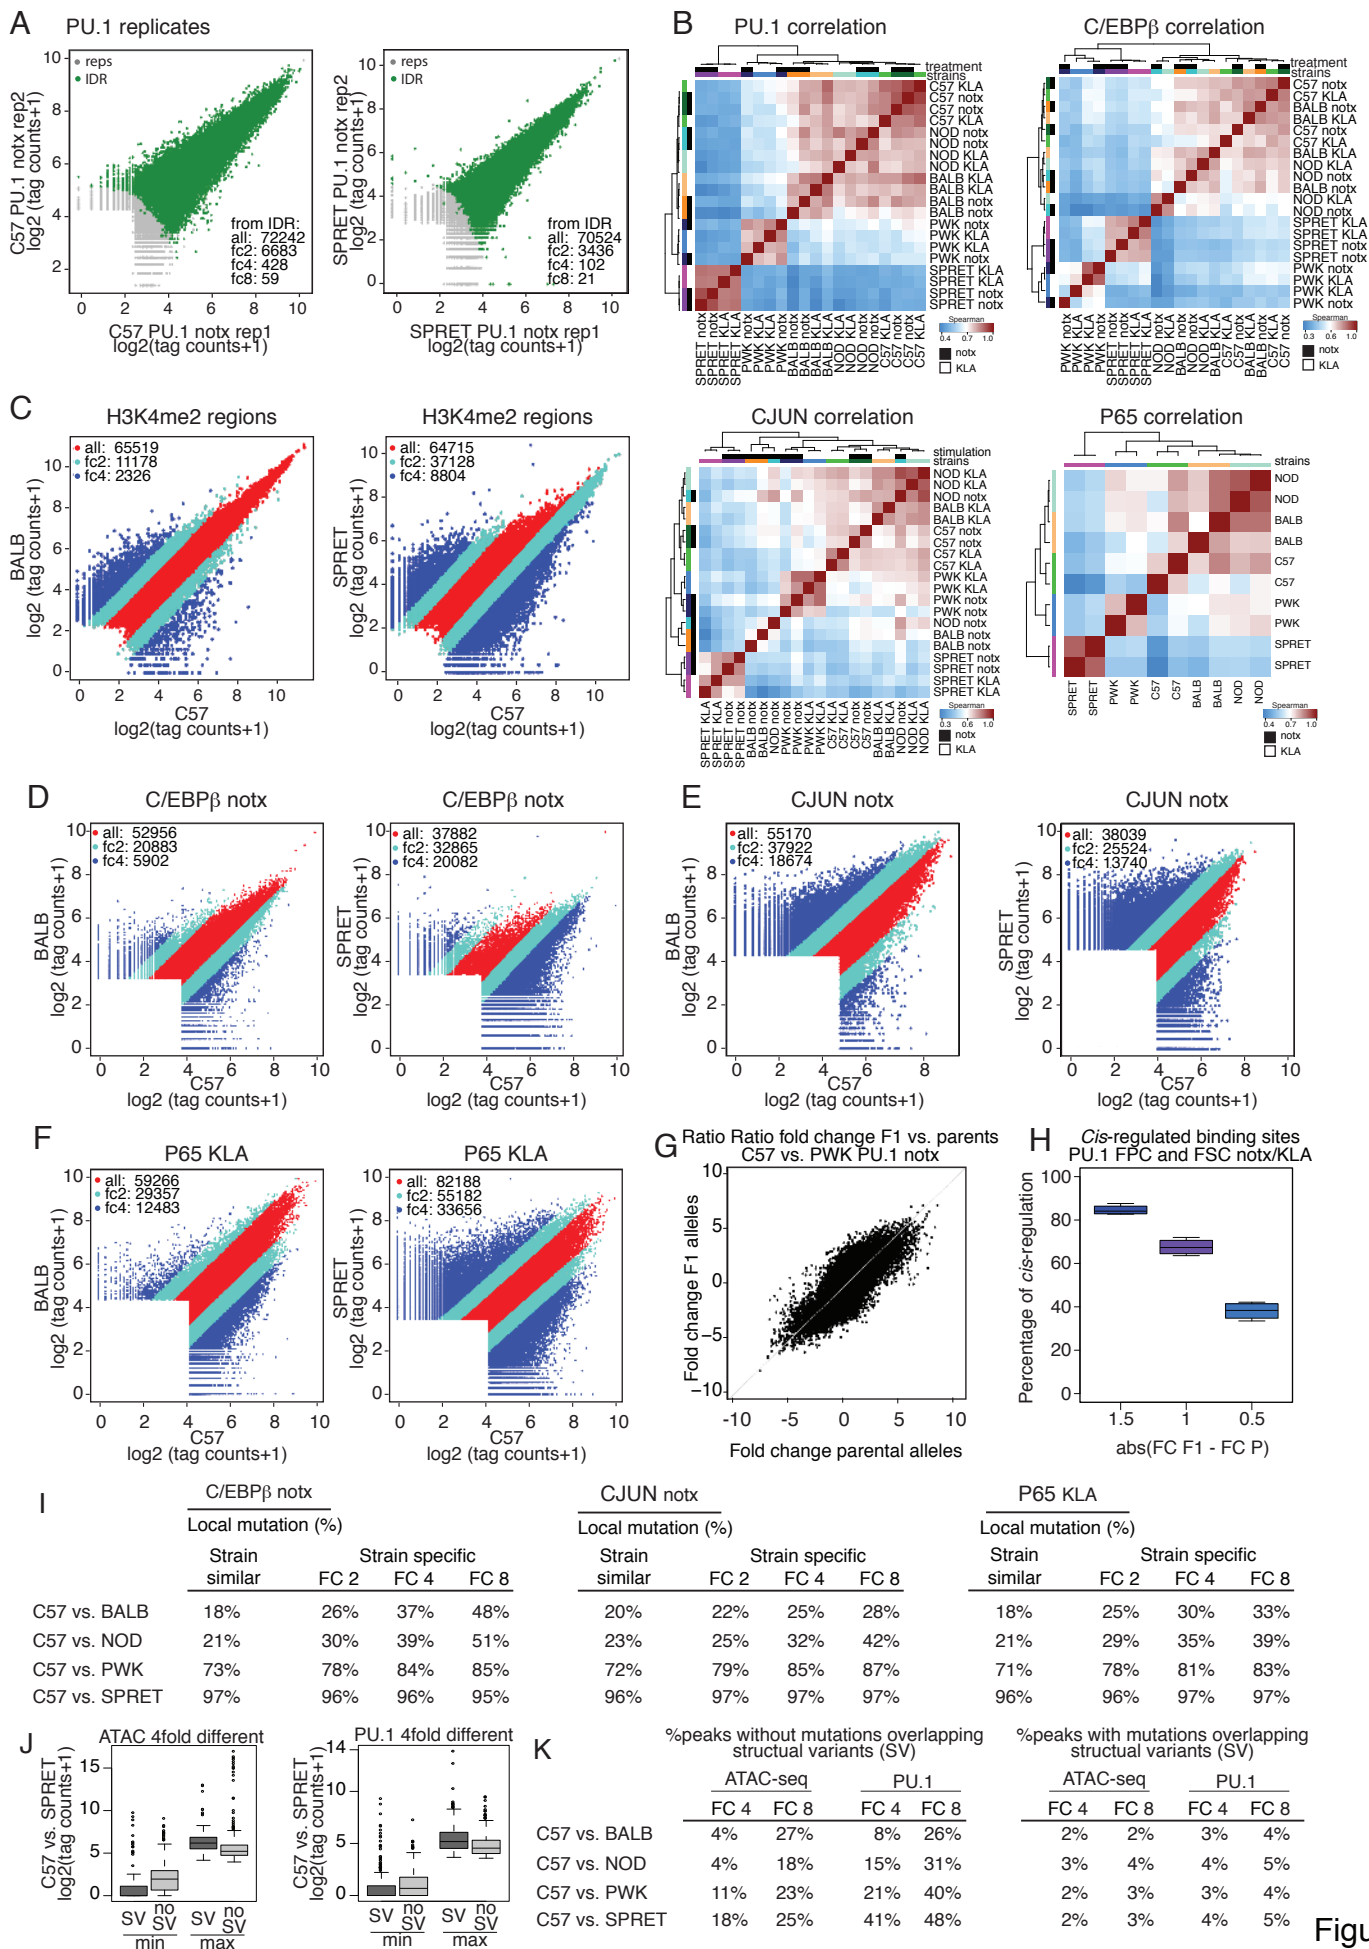

Figure S3

Supplement: NIHMS961989-supplement-3.pdf [file NIHMS961989-supplement-3.pdf]

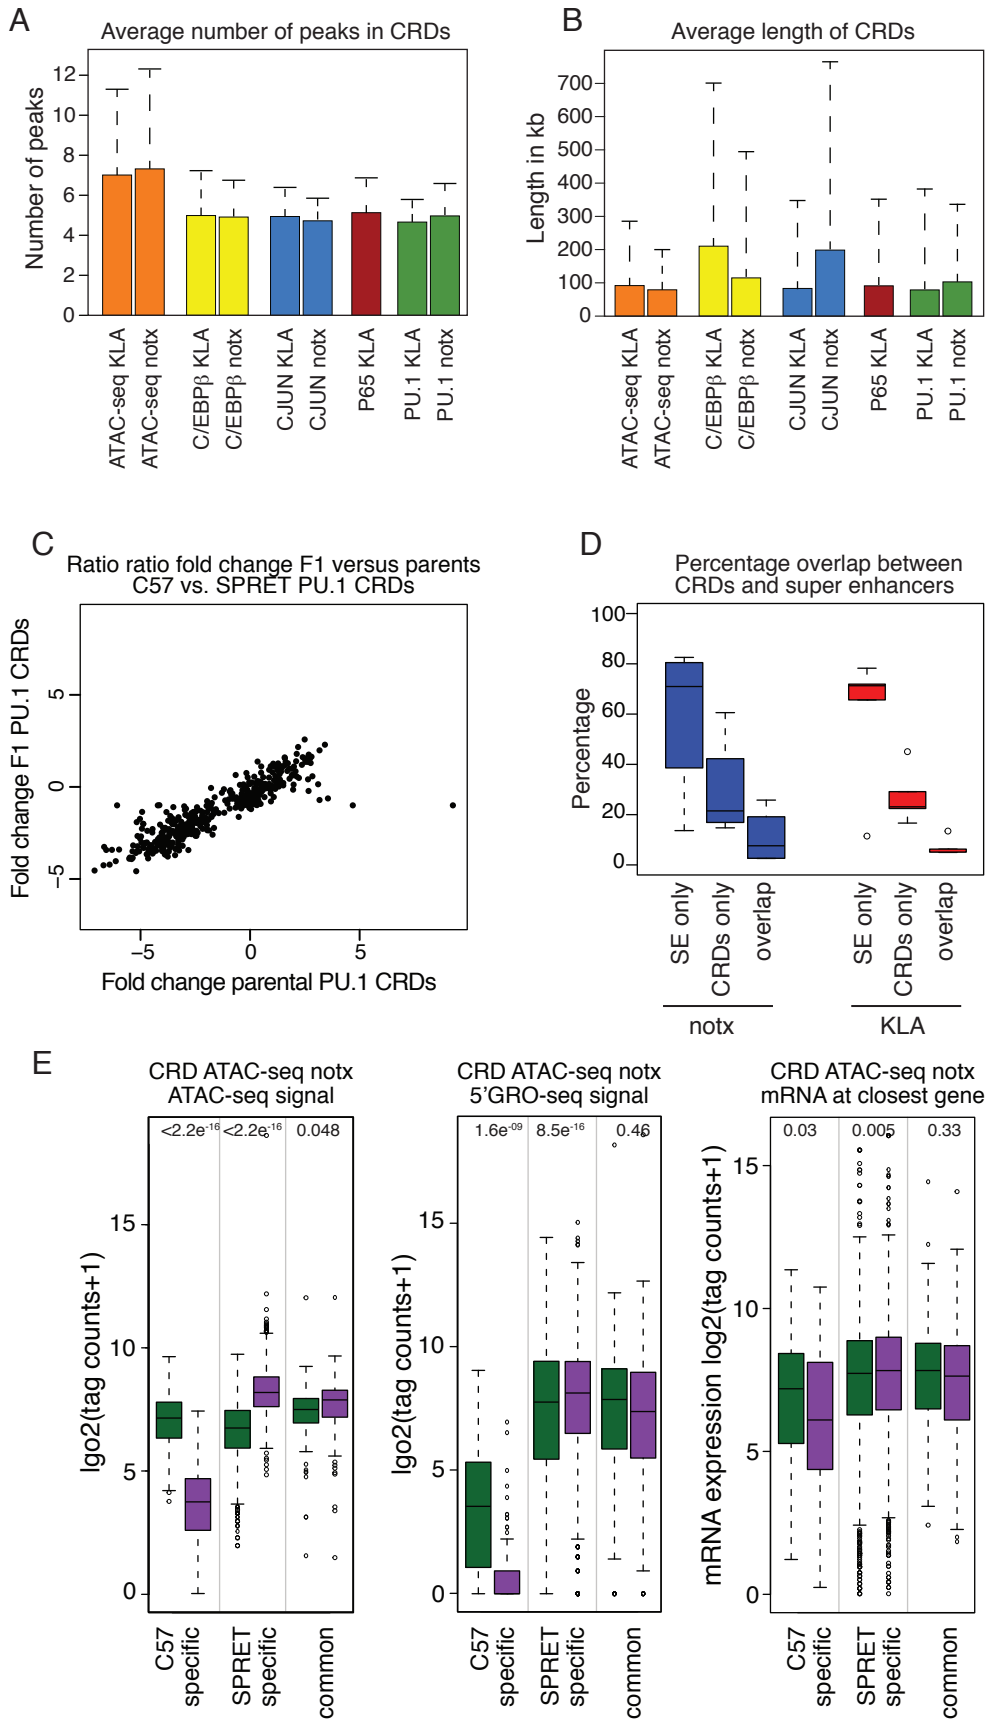

Figure S5

Supplement: NIHMS961989-supplement-5.pdf [file NIHMS961989-supplement-5.pdf]

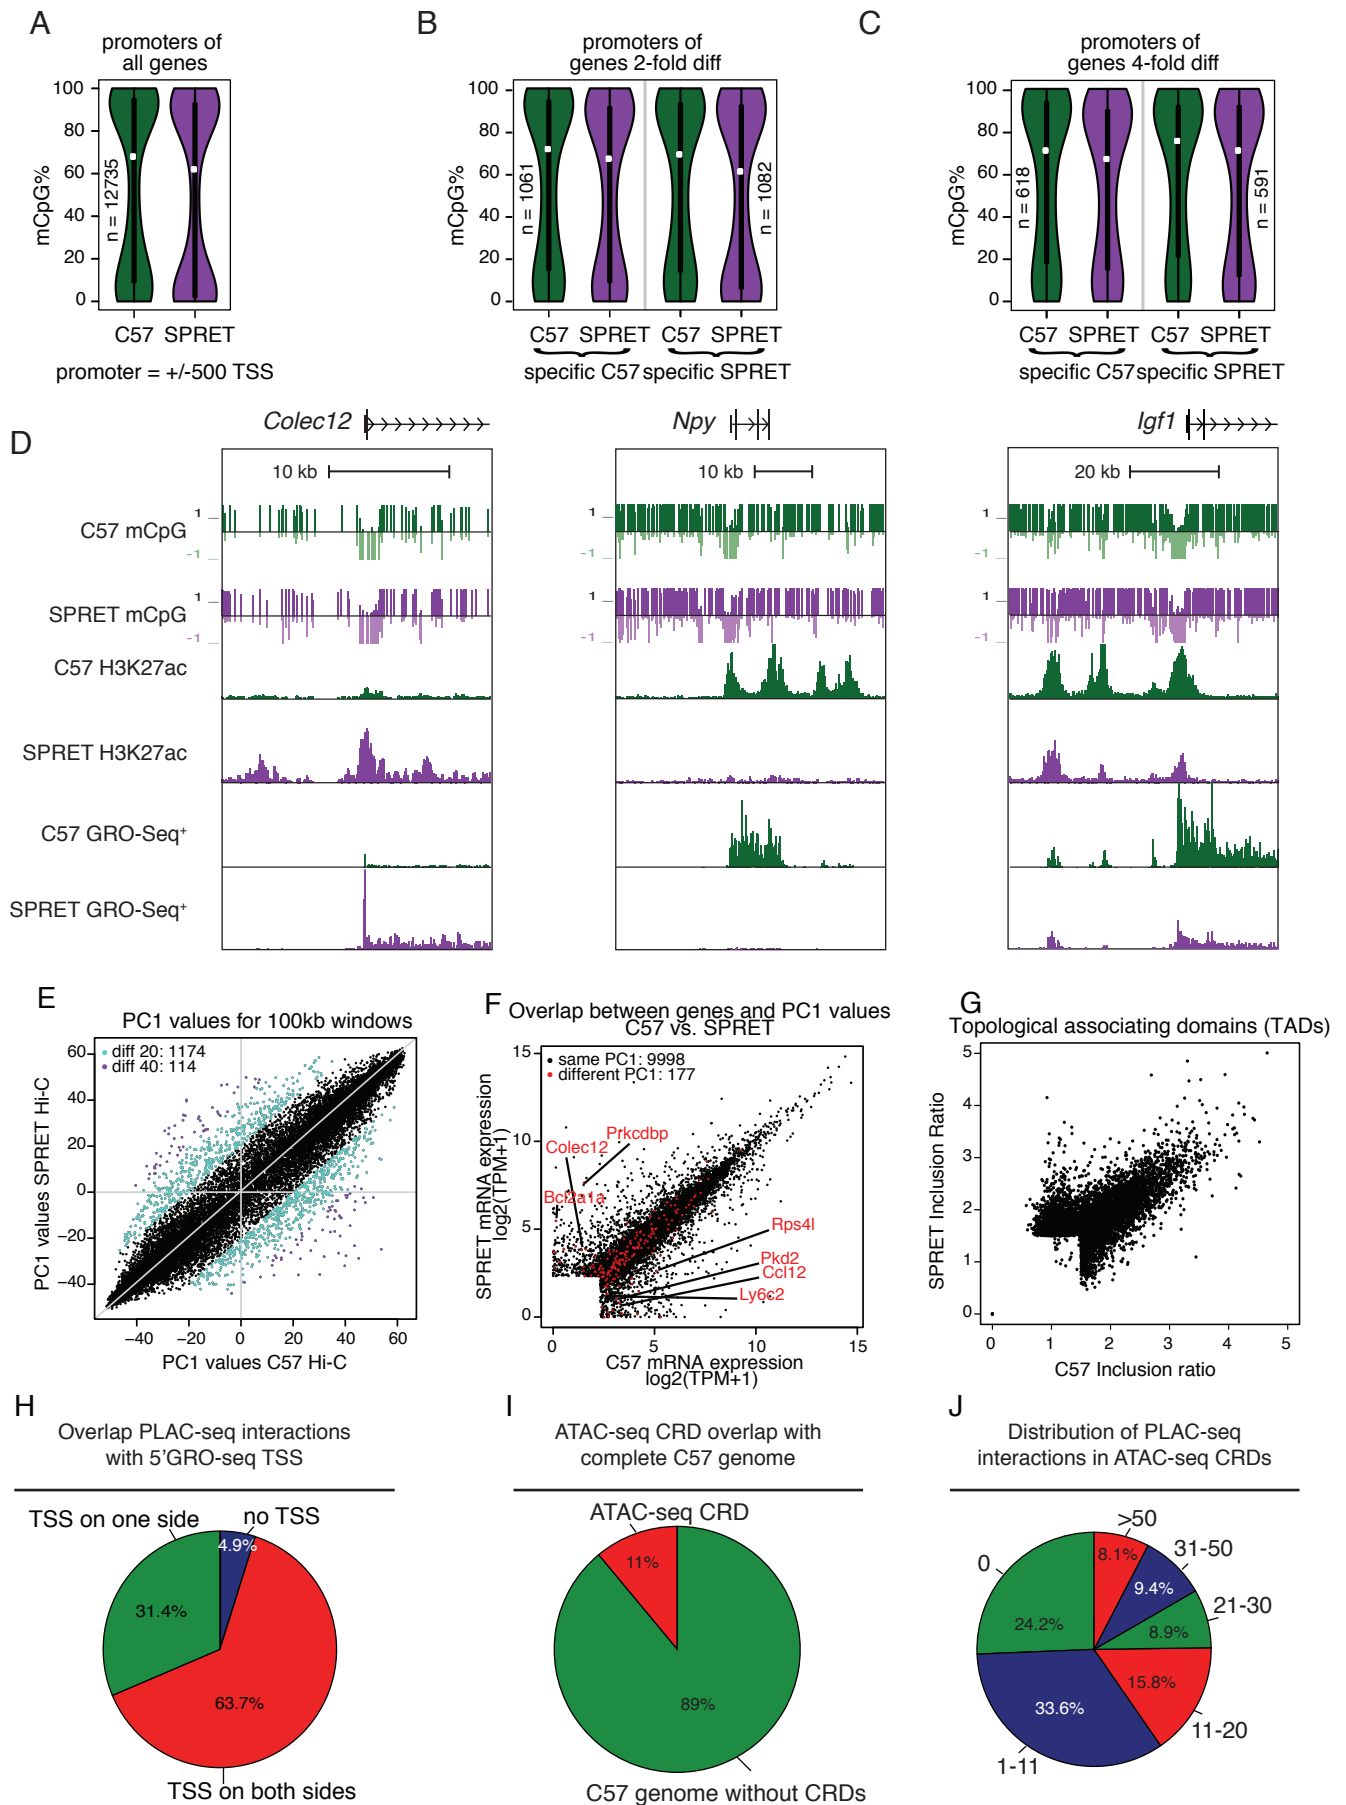

Figure S6

Supplement: NIHMS961989-supplement-6.pdf [file NIHMS961989-supplement-6.pdf]
